# Supplementary material for: Frequency of Common and Uncommon BRAF Alterations among Colorectal and Non-Colorectal Gastrointestinal Malignancies
Source: MDPI journal article supplement (doi:10.3390/cancers16101823), 2024-05-10
Supplement: s1 [file s1]

**Supplemental Table 1: Description of cohort and incidence of *BRAF* gain-of-function mutation by primary tumor location (detailed).**

| Characteristic         | Overall,<br>N = 51,560 <sup>1</sup> | BRAF_wt,<br>N = 49,044 <sup>2</sup> | BRAF_GOF,<br>N = 2,516 <sup>2</sup> |
|------------------------|-------------------------------------|-------------------------------------|-------------------------------------|
| Colon                  | 14,350<br>(28%)                     | 12,794 (89%)                        | 1,556 (11%)                         |
| Pancreas               | 14,300<br>(28%)                     | 14,041 (98%)                        | 259 (1.8%)                          |
| Rectum                 | 5,479 (11%)                         | 5,235 (96%)                         | 244 (4.5%)                          |
| Esophagus              | 3,316 (6.4%)                        | 3,286 (99%)                         | 30 (0.9%)                           |
| Stomach                | 3,029 (5.9%)                        | 2,981 (98%)                         | 48 (1.6%)                           |
| Intrahepatic bile duct | 2,370 (4.6%)                        | 2,244 (95%)                         | 126 (5.3%)                          |
| Liver                  | 1,585 (3.1%)                        | 1,566 (99%)                         | 19 (1.2%)                           |
| Gallbladder            | 1,023 (2.0%)                        | 1,004 (98%)                         | 19 (1.9%)                           |
| Rectosigmoid junction  | 827 (1.6%)                          | 789 (95%)                           | 38 (4.6%)                           |
| Biliary tract          | 792 (1.5%)                          | 763 (96%)                           | 29 (3.7%)                           |
| Appendix               | 788 (1.5%)                          | 770 (98%)                           | 18 (2.3%)                           |
| Extrahepatic bile duct | 738 (1.4%)                          | 712 (96%)                           | 26 (3.5%)                           |
| Gastrointestinal tract | 665 (1.3%)                          | 636 (96%)                           | 29 (4.4%)                           |
| Anus                   | 553 (1.1%)                          | 545 (99%)                           | 8 (1.4%)                            |
| Ampulla of Vater       | 508 (1.0%)                          | 485 (95%)                           | 23 (4.5%)                           |
| Small intestine        | 489 (0.9%)                          | 475 (97%)                           | 14 (2.9%)                           |
| Duodenum               | 414 (0.8%)                          | 395 (95%)                           | 19 (4.6%)                           |
| Intestinal tract       | 144 (0.3%)                          | 144 (100%)                          | 0 (0%)                              |
| Jejunum                | 104 (0.2%)                          | 94 (90%)                            | 10 (9.6%)                           |
| Ileum                  | 86 (0.2%)                           | 85 (99%)                            | 1 (1.2%)                            |

<sup>1</sup> n (%), note that percentage indicates column percent

<sup>2</sup> n (%), note that percentage indicates row percent

**Supplemental Table 2: Frequency of *BRAF* gain-of-function alteration by primary cancer location**

| Characteris<br>tic | Overall,<br>N =<br>2,516 <sup>1</sup> | CRC, N<br>=<br>1,838 <sup>1</sup> | Other<br>GI, N =<br>678 <sup>1</sup> | p-value <sup>2</sup> |
|--------------------|---------------------------------------|-----------------------------------|--------------------------------------|----------------------|
|--------------------|---------------------------------------|-----------------------------------|--------------------------------------|----------------------|

| <b>BRAF alteration class</b>     |             |             |           | <0.001 |
|----------------------------------|-------------|-------------|-----------|--------|
| SV                               | 2,367 (94%) | 1,791 (97%) | 576 (85%) |        |
| Fusion                           | 116 (4.6%)  | 35 (1.9%)   | 81 (12%)  |        |
| CNA                              | 25 (1.0%)   | 6 (0.3%)    | 19 (2.8%) |        |
| SV, Fusion                       | 6 (0.2%)    | 6 (0.3%)    | 0 (0%)    |        |
| CNA, Fusion                      | 1 (<0.1%)   | 0 (0%)      | 1 (0.1%)  |        |
| SV, CNA                          | 1 (<0.1%)   | 0 (0%)      | 1 (0.1%)  |        |
| <b>Short variant</b>             | 2,374 (94%) | 1,797 (98%) | 577 (85%) | <0.001 |
| <b>Copy number amplification</b> | 27 (1.1%)   | 6 (0.3%)    | 21 (3.1%) | <0.001 |
| <b>Fusion</b>                    | 123 (4.9%)  | 41 (2.2%)   | 82 (12%)  | <0.001 |

<sup>1</sup>n(%)

<sup>2</sup>Fisher's exact test; Pearson's Chi-squared test

**Supplemental Table 3: *BRAF* fusion by patient, orientation agnostically listed**

| <b>Fusion Gene</b> | <b>Overall, N = 2,516</b> | <b>CRC, N = 1,838</b> | <b>Other GI, N = 678</b> |
|--------------------|---------------------------|-----------------------|--------------------------|
| BRAF-SND1          | 31 (1.2%)                 | 3 (0.2%)              | 28 (4.1%)                |
| BRAF-TRIM24        | 11 (0.4%)                 | 5 (0.3%)              | 6 (0.9%)                 |
| BRAF-MKRN1         | 7 (0.3%)                  | 4 (0.2%)              | 3 (0.4%)                 |
| BRAF-CCNY          | 3 (0.1%)                  | 0 (0%)                | 3 (0.4%)                 |

|                           |           |           |          |
|---------------------------|-----------|-----------|----------|
| BRAF-RP1-167F1.2          | 3 (0.1%)  | 2 (0.1%)  | 1 (0.1%) |
| AGAP3-BRAF                | 2 (<0.1%) | 1 (<0.1%) | 1 (0.1%) |
| AKAP9-BRAF                | 2 (<0.1%) | 1 (<0.1%) | 1 (0.1%) |
| BRAF-COBLL1               | 2 (<0.1%) | 0 (0%)    | 2 (0.3%) |
| BRAF-GTF2IRD1             | 2 (<0.1%) | 2 (0.1%)  | 0 (0%)   |
| BRAF-NRF1                 | 2 (<0.1%) | 1 (<0.1%) | 1 (0.1%) |
| BRAF-ZC3HAV1              | 2 (<0.1%) | 1 (<0.1%) | 1 (0.1%) |
| AC073934.6-BRAF           | 1 (<0.1%) | 0 (0%)    | 1 (0.1%) |
| AGAP1-BRAF                | 1 (<0.1%) | 0 (0%)    | 1 (0.1%) |
| ANK3-BRAF                 | 1 (<0.1%) | 0 (0%)    | 1 (0.1%) |
| ATP11B-BRAF               | 1 (<0.1%) | 1 (<0.1%) | 0 (0%)   |
| BAIAP2L1-BRAF             | 1 (<0.1%) | 1 (<0.1%) | 0 (0%)   |
| BRAF-CCDC186              | 1 (<0.1%) | 0 (0%)    | 1 (0.1%) |
| BRAF-CEP290               | 1 (<0.1%) | 0 (0%)    | 1 (0.1%) |
| BRAF-CERT1                | 1 (<0.1%) | 0 (0%)    | 1 (0.1%) |
| BRAF-CHCHD3               | 1 (<0.1%) | 1 (<0.1%) | 0 (0%)   |
| BRAF-COG3, BRAF-PHF2P2    | 1 (<0.1%) | 0 (0%)    | 1 (0.1%) |
| BRAF-COG5                 | 1 (<0.1%) | 0 (0%)    | 1 (0.1%) |
| BRAF-CUX1                 | 1 (<0.1%) | 0 (0%)    | 1 (0.1%) |
| BRAF-DENND2A              | 1 (<0.1%) | 1 (<0.1%) | 0 (0%)   |
| BRAF-DENND2A, BRAF-POLR1D | 1 (<0.1%) | 0 (0%)    | 1 (0.1%) |
| BRAF-ERC1                 | 1 (<0.1%) | 0 (0%)    | 1 (0.1%) |
| BRAF-ESRP1                | 1 (<0.1%) | 0 (0%)    | 1 (0.1%) |
| BRAF-EXOC4                | 1 (<0.1%) | 0 (0%)    | 1 (0.1%) |
| BRAF-GOLGB1               | 1 (<0.1%) | 0 (0%)    | 1 (0.1%) |
| BRAF-KDM7A                | 1 (<0.1%) | 1 (<0.1%) | 0 (0%)   |
| BRAF-KIAA0754, BRAF-MACF1 | 1 (<0.1%) | 1 (<0.1%) | 0 (0%)   |
| BRAF-KIAA1217             | 1 (<0.1%) | 0 (0%)    | 1 (0.1%) |
| BRAF-KTN1                 | 1 (<0.1%) | 0 (0%)    | 1 (0.1%) |
| BRAF-LINC00882            | 1 (<0.1%) | 1 (<0.1%) | 0 (0%)   |
| BRAF-MCC                  | 1 (<0.1%) | 0 (0%)    | 1 (0.1%) |

|                                              |           |           |          |
|----------------------------------------------|-----------|-----------|----------|
| BRAF-MGAM                                    | 1 (<0.1%) | 0 (0%)    | 1 (0.1%) |
| BRAF-MKLN1                                   | 1 (<0.1%) | 1 (<0.1%) | 0 (0%)   |
| BRAF-PRSS1                                   | 1 (<0.1%) | 0 (0%)    | 1 (0.1%) |
| BRAF-PTPN1                                   | 1 (<0.1%) | 1 (<0.1%) | 0 (0%)   |
| BRAF-PTPN12                                  | 1 (<0.1%) | 1 (<0.1%) | 0 (0%)   |
| BRAF-PTPRN2                                  | 1 (<0.1%) | 0 (0%)    | 1 (0.1%) |
| BRAF-RAVER2                                  | 1 (<0.1%) | 1 (<0.1%) | 0 (0%)   |
| BRAF-RP11-689K5.3,<br>BRAF-SEC31A            | 1 (<0.1%) | 0 (0%)    | 1 (0.1%) |
| BRAF-RPL12                                   | 1 (<0.1%) | 1 (<0.1%) | 0 (0%)   |
| BRAF-RPS25                                   | 1 (<0.1%) | 0 (0%)    | 1 (0.1%) |
| BRAF-RRBP1                                   | 1 (<0.1%) | 0 (0%)    | 1 (0.1%) |
| BRAF-SEC24D                                  | 1 (<0.1%) | 0 (0%)    | 1 (0.1%) |
| BRAF-SGK3                                    | 1 (<0.1%) | 0 (0%)    | 1 (0.1%) |
| BRAF-SLC37A3                                 | 1 (<0.1%) | 0 (0%)    | 1 (0.1%) |
| BRAF-SLC4A4                                  | 1 (<0.1%) | 0 (0%)    | 1 (0.1%) |
| BRAF-SND1, BRAF-<br>TBXAS1                   | 1 (<0.1%) | 0 (0%)    | 1 (0.1%) |
| BRAF-SPAG16                                  | 1 (<0.1%) | 0 (0%)    | 1 (0.1%) |
| BRAF-SPECC1L                                 | 1 (<0.1%) | 0 (0%)    | 1 (0.1%) |
| BRAF-STK39                                   | 1 (<0.1%) | 0 (0%)    | 1 (0.1%) |
| BRAF-STRN3                                   | 1 (<0.1%) | 1 (<0.1%) | 0 (0%)   |
| BRAF-TMEM178B                                | 1 (<0.1%) | 0 (0%)    | 1 (0.1%) |
| BRAF-TMEM44                                  | 1 (<0.1%) | 1 (<0.1%) | 0 (0%)   |
| BRAF-TNS3                                    | 1 (<0.1%) | 1 (<0.1%) | 0 (0%)   |
| BRAF-TRIM44                                  | 1 (<0.1%) | 0 (0%)    | 1 (0.1%) |
| BRAF-ZKSCAN5                                 | 1 (<0.1%) | 0 (0%)    | 1 (0.1%) |
| CN amp, BRAF-<br>DENND11, BRAF-HIPK2         | 1 (<0.1%) | 0 (0%)    | 1 (0.1%) |
| p.Asp594Gly, BRAF-<br>MKRN1, BRAF-TRIM24     | 1 (<0.1%) | 1 (<0.1%) | 0 (0%)   |
| p.Gly469Ala,<br>p.Gly466Ala, BRAF-<br>NDUFB2 | 1 (<0.1%) | 1 (<0.1%) | 0 (0%)   |
| p.Val600Glu, ATR-BRAF,<br>BRAF-MIGA2         | 1 (<0.1%) | 1 (<0.1%) | 0 (0%)   |

|                          |           |           |        |
|--------------------------|-----------|-----------|--------|
| p.Val600Glu, BRAF-TRIM24 | 1 (<0.1%) | 1 (<0.1%) | 0 (0%) |
| p.Val600Glu, BRAF-UBE3C  | 1 (<0.1%) | 1 (<0.1%) | 0 (0%) |
| p.Val600Glu, BRAF-ZW10   | 1 (<0.1%) | 1 (<0.1%) | 0 (0%) |

**Supplemental Table 4: Microsatellite instability and tumor mutation burden among patients with *BRAF* gain-of-function mutation by primary cancer location.**

|                         | Overall, N<br>= 2,516 <sup>1</sup> | CRC, N =<br>1,838 <sup>1</sup> | Other GI, N<br>= 678 <sup>1</sup> | p-value <sup>2</sup> |
|-------------------------|------------------------------------|--------------------------------|-----------------------------------|----------------------|
| <b>TMB (mut/Mb)</b>     |                                    |                                |                                   | <0.001               |
| Not TMB-high            | 1,409 (75%)                        | 940 (69%)                      | 469 (93%)                         |                      |
| TMB-high                | 459 (25%)                          | 425 (31%)                      | 34 (6.8%)                         |                      |
| Unknown                 | 648                                | 473                            | 175                               |                      |
| <b>MSI</b>              |                                    |                                |                                   | <0.001               |
| Not detected/Low/Stable | 2,007 (80%)                        | 1,358 (74%)                    | 649 (96%)                         |                      |
| High                    | 505 (20%)                          | 476 (26%)                      | 29 (4.3%)                         |                      |
| Unknown                 | 4                                  | 4                              | 0                                 |                      |

\* TMB-high is defined as  $\geq 10$  mutations/megabase in tissue and  $\geq 15$  mutations/megabase in blood.

<sup>1</sup> n (%)

<sup>2</sup> Pearson's Chi-squared test

**Supplemental Table 5. Prevalence of co-mutations in colorectal cancers and non-colorectal GI cancers with *BRAF* alterations.**

|               | <b>CRC, N<br/>= 1,838<sup>1</sup></b> | <b>Other<br/>GI, N =<br/>678<sup>1</sup></b> | <b>p-<br/>value<sup>2</sup></b> | <b>q-<br/>value<sup>3</sup></b> |
|---------------|---------------------------------------|----------------------------------------------|---------------------------------|---------------------------------|
| <b>TP53</b>   | 1,295<br>(70%)                        | 350<br>(52%)                                 | <0.001                          | <0.001                          |
| <b>APC</b>    | 781<br>(42%)                          | 85<br>(13%)                                  | <0.001                          | <0.001                          |
| <b>CDKN2A</b> | 96<br>(5.2%)                          | 220<br>(32%)                                 | <0.001                          | <0.001                          |
| <b>RNF43</b>  | 548<br>(30%)                          | 35<br>(5.2%)                                 | <0.001                          | <0.001                          |
| <b>SMAD4</b>  | 410<br>(22%)                          | 117<br>(17%)                                 | 0.006                           | 0.008                           |
| <b>PIK3CA</b> | 389<br>(21%)                          | 67<br>(9.9%)                                 | <0.001                          | <0.001                          |
| <b>CDKN2B</b> | 73<br>(4.0%)                          | 137<br>(20%)                                 | <0.001                          | <0.001                          |
| <b>MSH3</b>   | 337<br>(18%)                          | 21<br>(3.1%)                                 | <0.001                          | <0.001                          |
| <b>KMT2D</b>  | 324<br>(18%)                          | 40<br>(5.9%)                                 | <0.001                          | <0.001                          |

|               |               |              |        |        |
|---------------|---------------|--------------|--------|--------|
| <b>ARID1A</b> | 317<br>(17%)  | 114<br>(17%) | 0.8    | 0.8    |
| <b>PTEN</b>   | 305<br>(17%)  | 27<br>(4.0%) | <0.001 | <0.001 |
| <b>KRAS</b>   | 212<br>(12%)  | 112<br>(17%) | <0.001 | 0.001  |
| <b>FBXW7</b>  | 294<br>(16%)  | 25<br>(3.7%) | <0.001 | <0.001 |
| <b>MTAP</b>   | 36<br>(2.0%)  | 106<br>(16%) | <0.001 | <0.001 |
| <b>ALK</b>    | 271<br>(15%)  | 103<br>(15%) | 0.8    | 0.8    |
| <b>MSH6</b>   | 233<br>(13%)  | 16<br>(2.4%) | <0.001 | <0.001 |
| <b>RET</b>    | 210<br>(11%)  | 85<br>(13%)  | 0.4    | 0.5    |
| <b>ACVR2A</b> | 228<br>(12%)  | 20<br>(2.9%) | <0.001 | <0.001 |
| <b>UGT1A1</b> | 156<br>(8.5%) | 78<br>(12%)  | 0.021  | 0.026  |
| <b>KMT2C</b>  | 195<br>(11%)  | 33<br>(4.9%) | <0.001 | <0.001 |
| <b>BRCA2</b>  | 192<br>(10%)  | 49<br>(7.2%) | 0.015  | 0.02   |
| <b>NTRK3</b>  | 132<br>(7.2%) | 70<br>(10%)  | 0.01   | 0.013  |
| <b>NOTCH1</b> | 189<br>(10%)  | 43<br>(6.3%) | 0.002  | 0.003  |
| <b>ZNRF3</b>  | 182<br>(9.9%) | 16<br>(2.4%) | <0.001 | <0.001 |
| <b>LRP1B</b>  | 180<br>(9.8%) | 33<br>(4.9%) | <0.001 | <0.001 |
| <b>RAD50</b>  | 177<br>(9.6%) | 11<br>(1.6%) | <0.001 | <0.001 |
| <b>ASXL1</b>  | 173<br>(9.4%) | 15<br>(2.2%) | <0.001 | <0.001 |
| <b>HNF1A</b>  | 159<br>(8.7%) | 8<br>(1.2%)  | <0.001 | <0.001 |
| <b>B2M</b>    | 147<br>(8.0%) | 11<br>(1.6%) | <0.001 | <0.001 |



|               |               |              |        |        |
|---------------|---------------|--------------|--------|--------|
| <b>NRG1</b>   | 146<br>(7.9%) | 49<br>(7.2%) | 0.6    | 0.6    |
| <b>ATM</b>    | 145<br>(7.9%) | 40<br>(5.9%) | 0.09   | 0.11   |
| <b>BCOR</b>   | 144<br>(7.8%) | 25<br>(3.7%) | <0.001 | <0.001 |
| <b>CREBBP</b> | 141<br>(7.7%) | 8<br>(1.2%)  | <0.001 | <0.001 |
| <b>FLCN</b>   | 141<br>(7.7%) | 13<br>(1.9%) | <0.001 | <0.001 |
| <b>BCL6</b>   | 140<br>(7.6%) | 45<br>(6.6%) | 0.4    | 0.4    |
| <b>CYP1B1</b> | 132<br>(7.2%) | 41<br>(6.0%) | 0.3    | 0.4    |
| <b>TCF7L2</b> | 132<br>(7.2%) | 6<br>(0.9%)  | <0.001 | <0.001 |
| <b>NTRK2</b>  | 52<br>(2.8%)  | 46<br>(6.8%) | <0.001 | <0.001 |
| <b>CIC</b>    | 123<br>(6.7%) | 17<br>(2.5%) | <0.001 | <0.001 |
| <b>RPL22</b>  | 122<br>(6.6%) | 9<br>(1.3%)  | <0.001 | <0.001 |
| <b>BCORL1</b> | 120<br>(6.5%) | 14<br>(2.1%) | <0.001 | <0.001 |
| <b>CASP8</b>  | 115<br>(6.3%) | 7<br>(1.0%)  | <0.001 | <0.001 |
| <b>PTCH1</b>  | 115<br>(6.3%) | 7<br>(1.0%)  | <0.001 | <0.001 |
| <b>ARID1B</b> | 114<br>(6.2%) | 20<br>(2.9%) | 0.001  | 0.002  |
| <b>PIK3R1</b> | 111<br>(6.0%) | 14<br>(2.1%) | <0.001 | <0.001 |
| <b>TERT</b>   | 40<br>(2.2%)  | 40<br>(5.9%) | <0.001 | <0.001 |
| <b>ZFHX3</b>  | 107<br>(5.8%) | 13<br>(1.9%) | <0.001 | <0.001 |
| <b>ARID2</b>  | 95<br>(5.2%)  | 38<br>(5.6%) | 0.7    | 0.7    |

|                        |            |           |        |        |
|------------------------|------------|-----------|--------|--------|
| <b>MTAP-downstream</b> | 9 (0.5%)   | 37 (5.5%) | <0.001 | <0.001 |
| <b>NF1</b>             | 100 (5.4%) | 29 (4.3%) | 0.2    | 0.3    |
| <b>FAT1</b>            | 99 (5.4%)  | 17 (2.5%) | 0.002  | 0.003  |
| <b>PMS2</b>            | 95 (5.2%)  | 28 (4.1%) | 0.3    | 0.3    |
| <b>GNAS</b>            | 85 (4.6%)  | 35 (5.2%) | 0.6    | 0.6    |
| <b>ATR</b>             | 94 (5.1%)  | 7 (1.0%)  | <0.001 | <0.001 |
| <b>CHD2</b>            | 94 (5.1%)  | 4 (0.6%)  | <0.001 | <0.001 |
| <b>MLH3</b>            | 93 (5.1%)  | 4 (0.6%)  | <0.001 | <0.001 |
| <b>FGFR3</b>           | 69 (3.8%)  | 34 (5.0%) | 0.2    | 0.2    |
| <b>MYB</b>             | 56 (3.0%)  | 34 (5.0%) | 0.018  | 0.024  |
| <b>AMER1</b>           | 92 (5.0%)  | 12 (1.8%) | <0.001 | <0.001 |

\* Somatic alterations include short variant pathogenic/likely pathogenic mutations and copy number alterations (loss or amplification, copy number 0 or  $\geq 8$ , respectively)

<sup>1</sup> n (%)

<sup>2</sup> Pearson's Chi-squared test

<sup>3</sup> False discovery rate correction for multiple testing
